# Supplementary material
Source: PubMed Central journal article supplement (PMC4800041)
Supplement: mmc1.pdf [file mmc1.pdf]

**The American Journal of Human Genetics, Volume 98**

**Supplemental Information**

**A Clinical Service to Support the Return  
of Secondary Genomic Findings in Human Research**

**Andrew J. Darnell, Howard Austin, David A. Bluemke, Richard O. Cannon III, Kenneth Fischbeck, William Gahl, David Goldman, Christine Grady, Mark H. Greene, Steven M. Holland, Sara Chandros Hull, Forbes D. Porter, David Resnik, Wendy S. Rubinstein, and Leslie G. Biesecker**

Cost estimates for a Secondary Genomics Findings Consultation service in the Intramural Research Program of the National Institutes of Health.

**Table S1: Overall Costs**

| Number of Analyzed Exomes or genomes per year | Number of secondary findings per year | Salaries & Benefits (Table 2) | Sample intake costs | ABI Arrays | PCR Validations | Office & Computer Expenses | Fixed Costs* | Total Projected Cost | Cost per Exome |
|-----------------------------------------------|---------------------------------------|-------------------------------|---------------------|------------|-----------------|----------------------------|--------------|----------------------|----------------|
| 1,000                                         | 50                                    | \$82,600                      | \$500               | \$1,000    | \$3,000         | \$2,500                    | \$50,000     | \$139,600            | \$140          |
| 5,000                                         | 250                                   | \$188,000                     | \$2,500             | \$1,000    | \$15,000        | \$5,000                    | \$50,000     | \$261,500            | \$52           |
| 10,000                                        | 500                                   | \$327,600                     | \$5,000             | \$1,000    | \$30,000        | \$10,000                   | \$50,000     | \$423,600            | \$42           |
| 20,000                                        | 1,000                                 | \$516,000                     | \$10,000            | \$2,000    | \$60,000        | \$15,000                   | \$50,000     | \$653,000            | \$33           |

Fixed costs include software licensing, sequencer service contract and amortization, etc.

**Table S2: Staffing Costs**

|                         | Annual Personnel Cost | Number of Exomes/Genomes Sequenced |                  |                  |                  |
|-------------------------|-----------------------|------------------------------------|------------------|------------------|------------------|
|                         |                       | 1,000                              | 5,000            | 10,000           | 20,000           |
| Clinical Support        | \$40,000              | \$4,000                            | \$20,000         | \$40,000         | \$80,000         |
| Bioinformatics          | \$200,000             | \$20,000                           | \$40,000         | \$80,000         | \$80,000         |
| Lab Technician          | \$60,000              | \$9,000                            | \$12,000         | \$30,000         | \$60,000         |
| Lab Director            | \$200,000             | \$40,000                           | \$80,000         | \$120,000        | \$200,000        |
| Genetic Counselor       | \$96,000              | \$9,600                            | \$36,000         | \$57,600         | \$96,000         |
| Lab costs               |                       |                                    |                  |                  |                  |
| <b>Total</b>            |                       | <b>\$82,600</b>                    | <b>\$188,000</b> | <b>\$327,600</b> | <b>\$516,000</b> |
| <b>Per exome/genome</b> |                       | <b>\$82.60</b>                     | <b>\$37.60</b>   | <b>\$32.76</b>   | <b>\$25.80</b>   |

We have specified personnel costs using an estimated fraction of effort (e.g., for 1,000 exomes per year, we estimate it would require about 10% effort or 4 hours per week of a support person whose salary and benefits would be \$40,000 per year).

Laboratory costs were estimated to be

Scope of Staff Work:

Clinical Support: Arranging for sample intake/shipping, ordering, & patient scheduling.

Bioinformatician: Running filters to screen submitted variants for basic pathogenicity criteria, identifying relevant publications & database entries for variants that pass filters, programming duties, & updating filters.

Lab technician: Sample accessioning, DNA isolation, database entry, PCR validations, organizing and preparing data for Lab Dir.

Lab Director: CLIA licensing, training staff, monitoring literature, performing final pathogenicity determinations, reviewing and signing final reports, proposing gene list changes.

Genetic Counselor: Returning findings to research participants (obtain pedigree, provide genetic counseling, and communicating result to identified local provider).
